# Supplementary material
Source: publisher site journal article supplement (https://www.dovepress.com/article/253137)
Supplement: Supplementary file 1 [file get_supplementary_file.php]

**Supplementary legends.**

**Supplementary Figure 1**


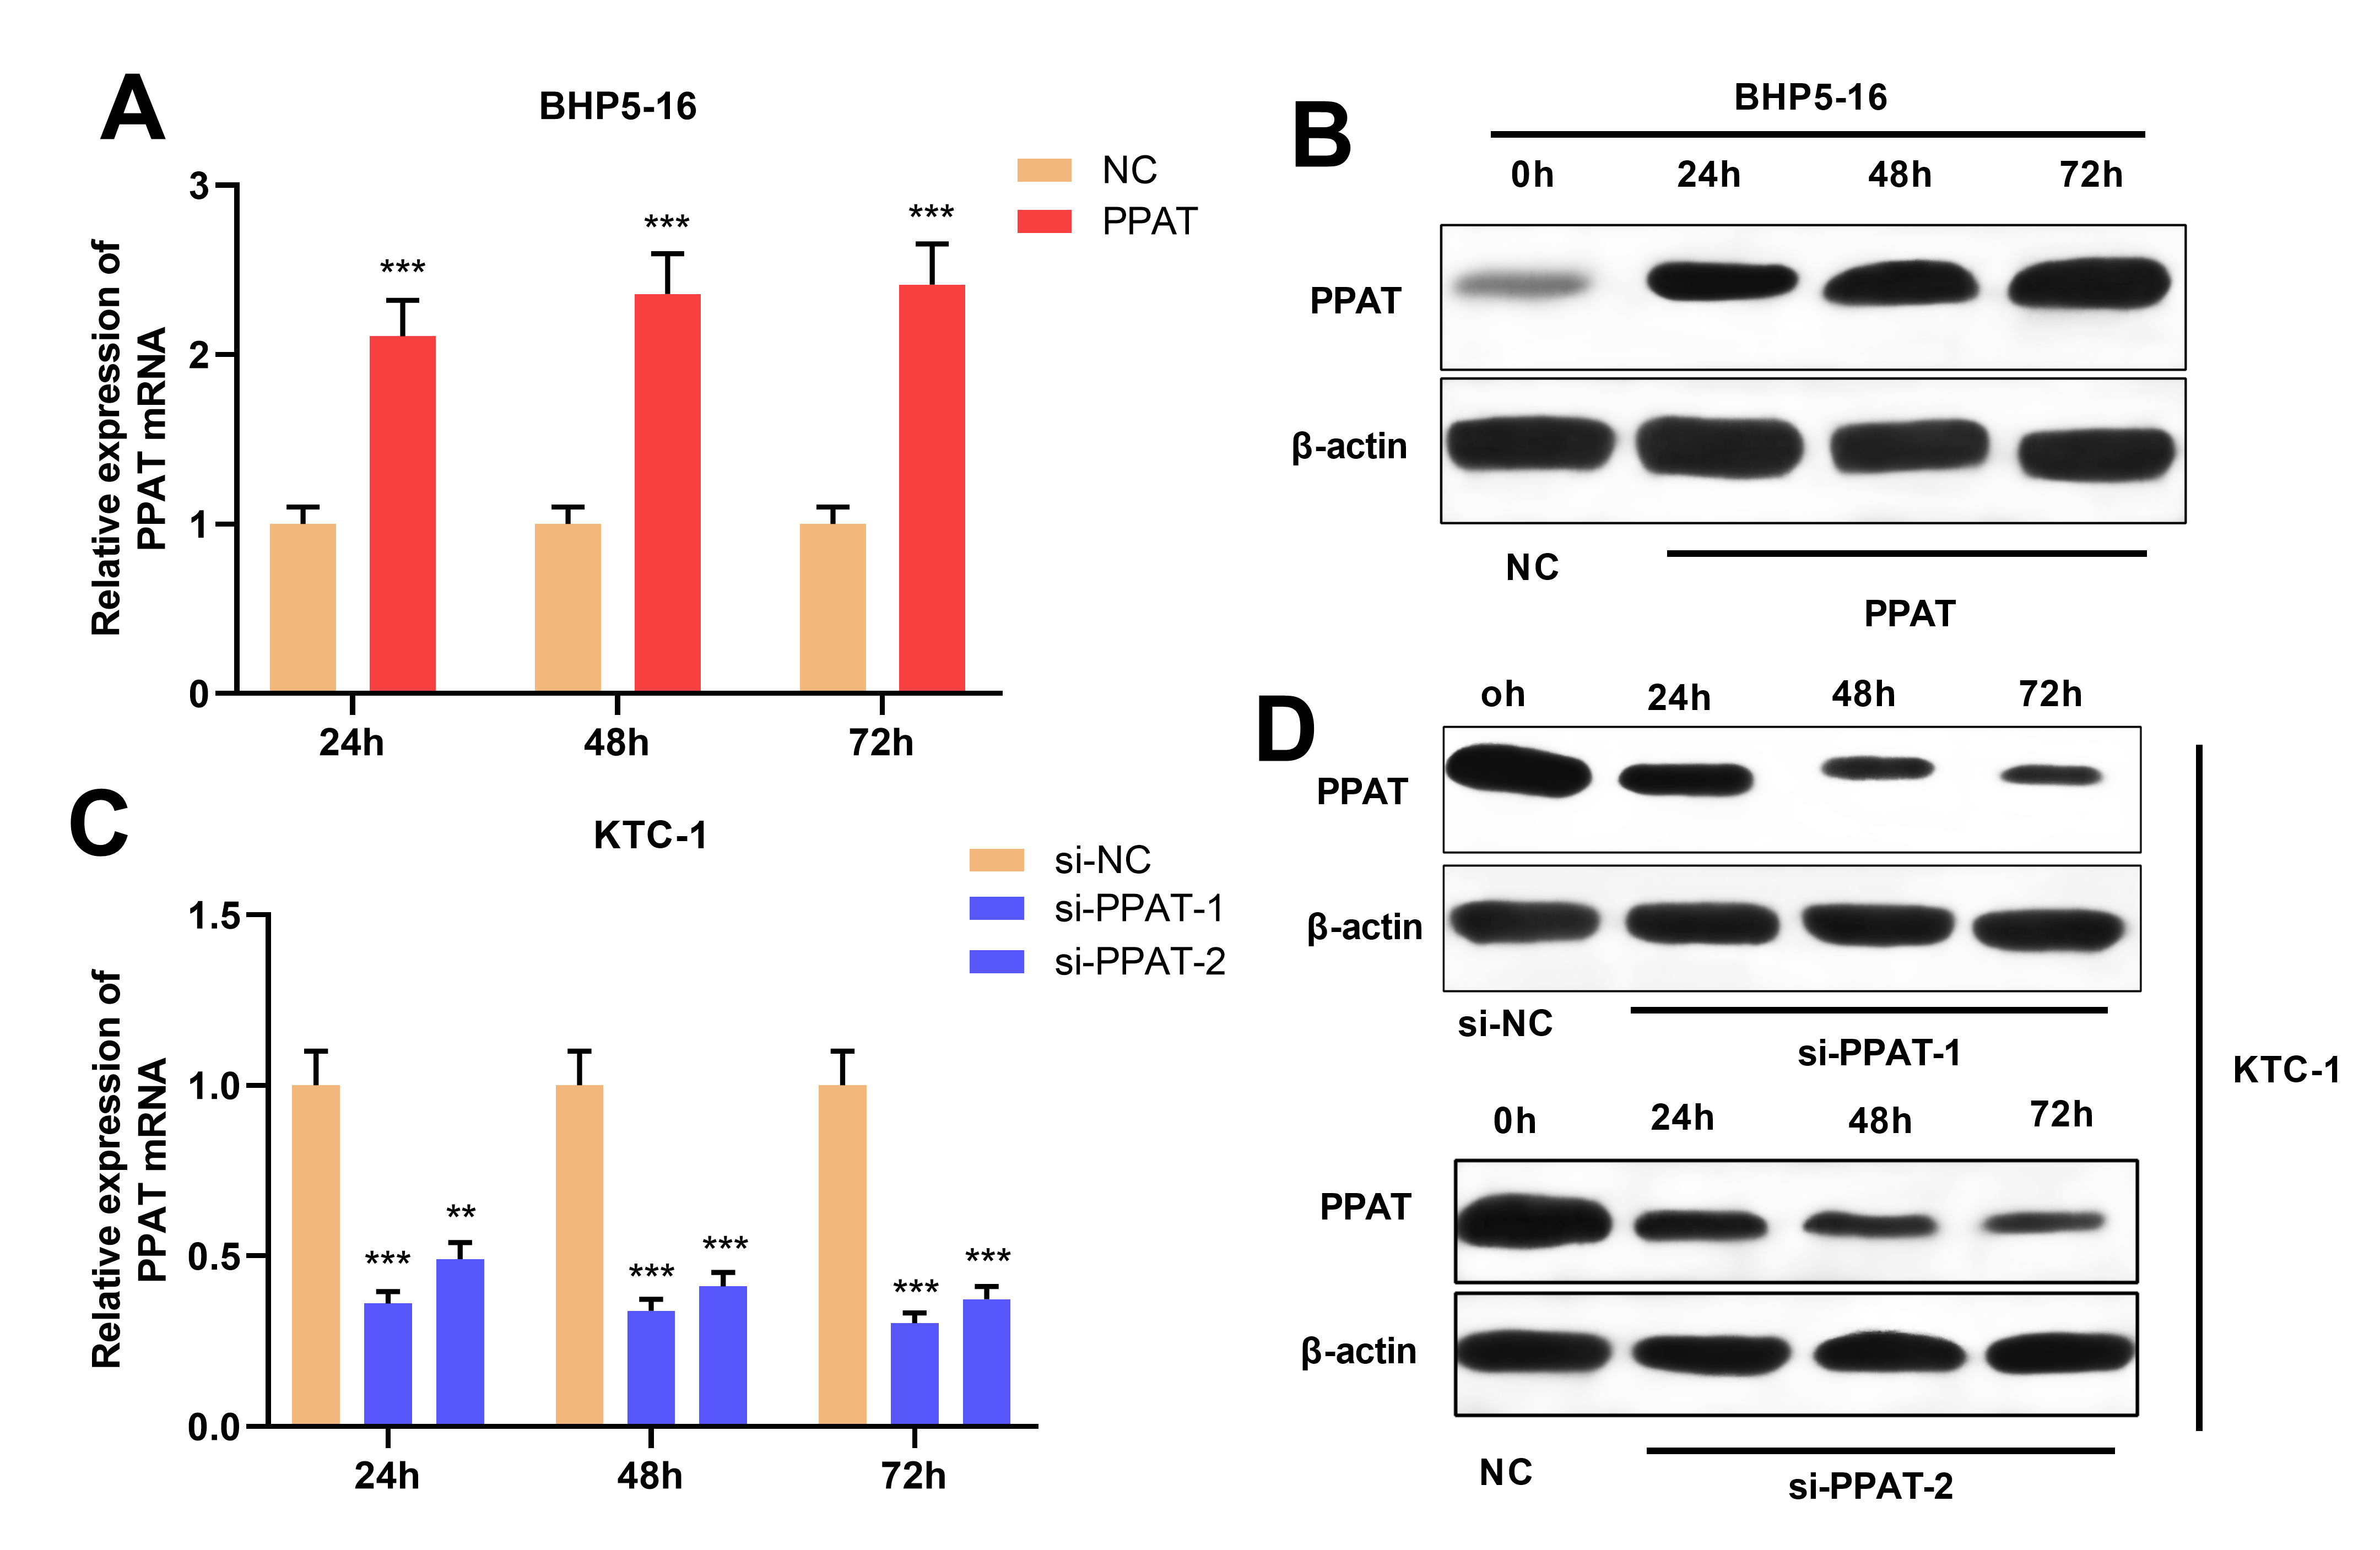


A-D: qRT-PCR and Western blot were used to detect the expression of PPAT in TC cells after overexpression or knockdown of PPAT.

The experimental results were analyzed by student's t test, and the difference was statistically significant with *P* < 0.05. ** *P*<0.01, *** *P* < 0.001.

**Supplementary Figure 2**


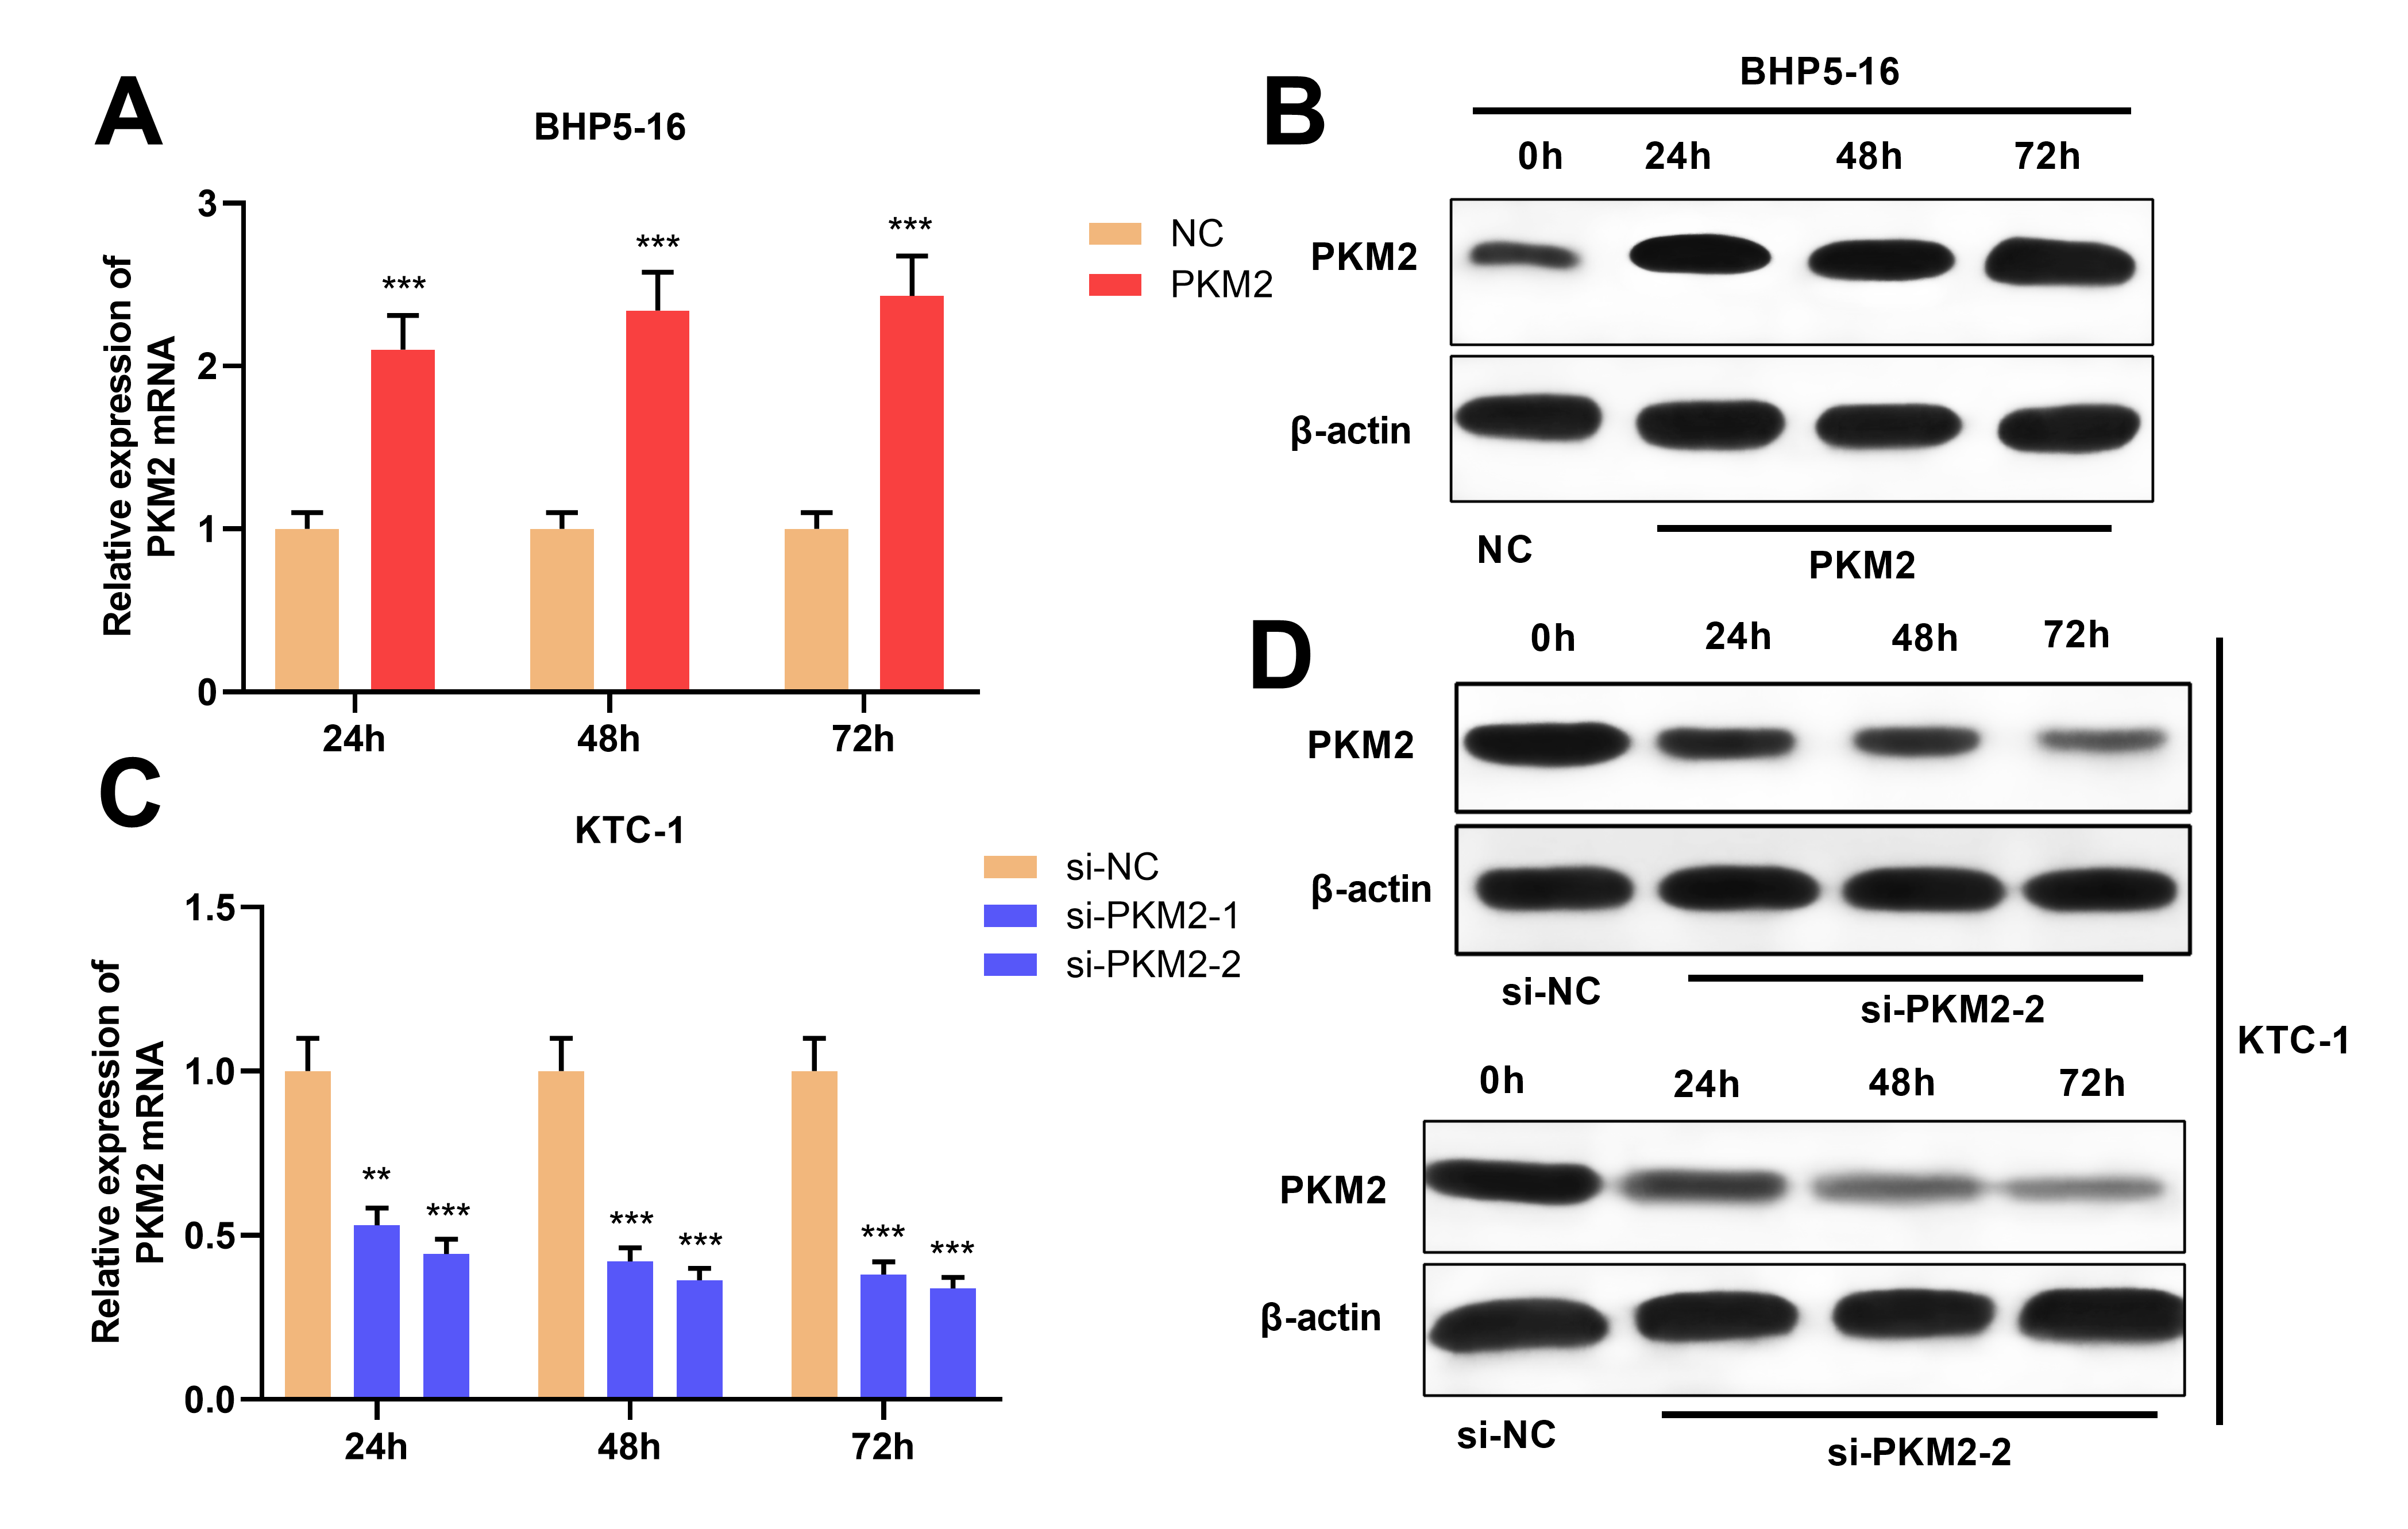
A-D: qRT-PCR and Western blot were used to detect the expression of PKM2 in TC cells after overexpression or knockdown of PKM2.

The experimental results were analyzed by student's t test, and the difference was statistically significant with *P* < 0.05. ** *P*<0.01, *** *P* < 0.001.

**Supplementary Figure 3**


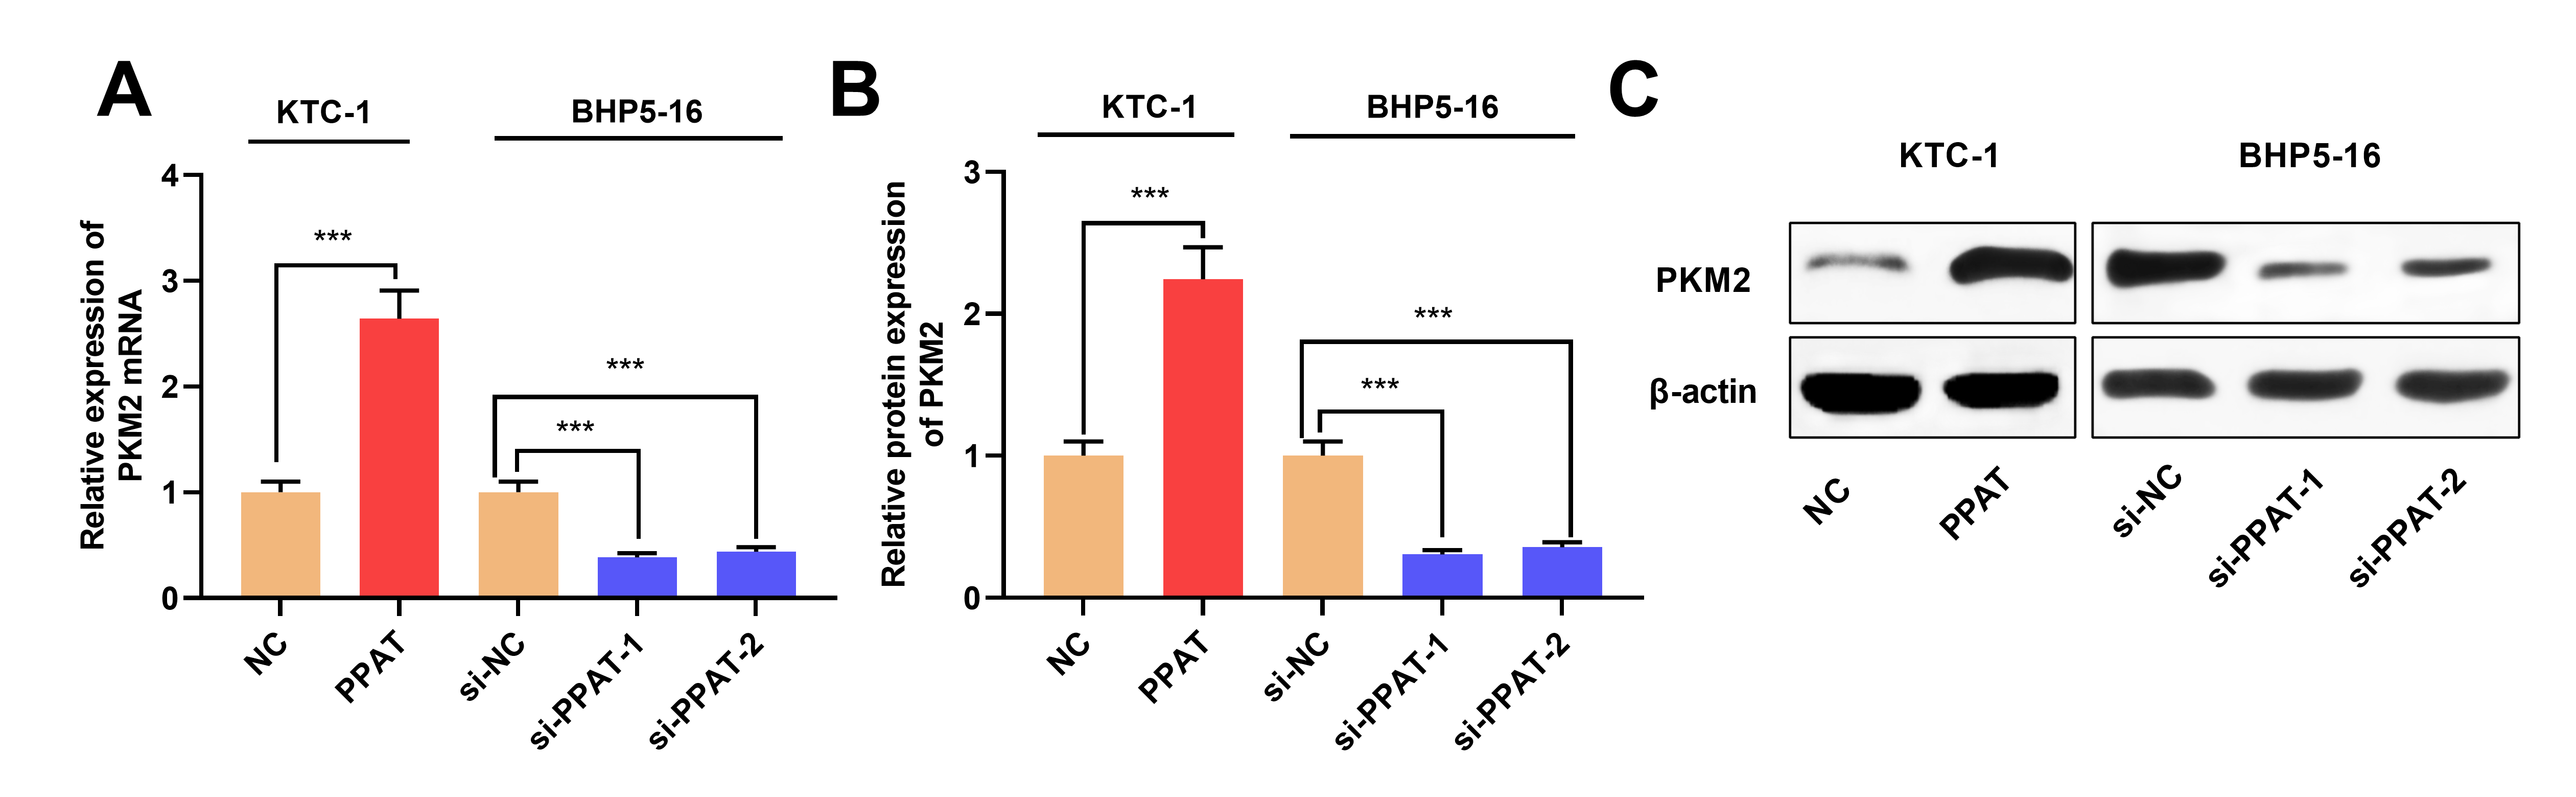


A.qRT-PCR was used to detect the expression of PKM2 mRNA in KTC-1 cells overexpressing PPAT and BHP5-16 cells knocking down PPAT.

B&C. Western blot was used to detect the expression of PKM2 protein in KTC-1 cells overexpressing PPAT and BHP5-16 cells knocking down PPAT.

The experimental results were analyzed by student's t test, and the difference was statistically significant with *P* < 0.05. *** *P* < 0.001.
